# Supplementary material
Source: PubMed Central journal article supplement (PMC7497633)
Supplement: jf0c02842_si_001.pdf [file jf0c02842_si_001.pdf]

1        **Characterization and Quantification of Non-anthocyanin Phenolic Compounds in**  
2        **White and Blue Bilberry (*Vaccinium myrtillus*) Juices and Wines Using UHPLC-DAD–**  
3        **ESI-QTOF-MS and UHPLC-DAD**

4

5                    Shuxun Liu\*, Alexis Marsol-Vall, Oskar Laaksonen, Maaria Kortensniemi, Baoru Yang

6        Food Chemistry and Food Development, Department of Biochemistry, University of Turku, FI-20014 Turku, Finland

7                    \*Corresponding author. E-mail address: shuxun.liu@utu.fi; Tel.: +358 449849521

8

9

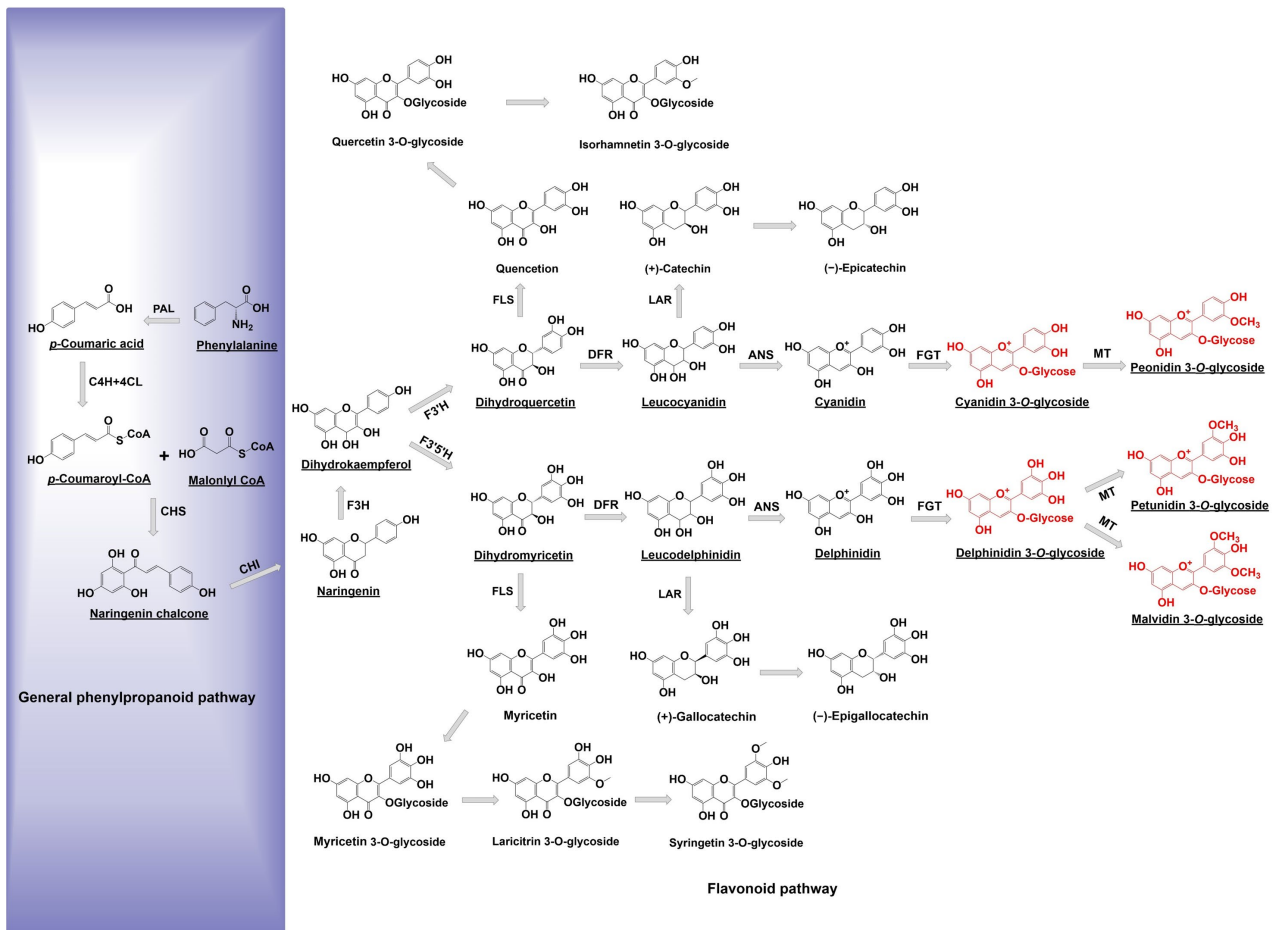

10

11 **Figure S1.** Simplified flavonoid biosynthesis pathway, with emphasis on the flavonoids found in  
 12 *Vaccinium myrtillus*.<sup>1,2</sup> Abbreviations: PAL, phenylalanine ammonia lyase; C4H, cinnamate 4-  
 13 hydroxylase; 4CL, 4-coumarate-CoA ligase; CHS, chalcone synthase; CHI, chalcone isomerase; F3H,  
 14 flavanone 3-hydroxylase; F3'H, flavonoid 3'-hydroxylase; F3'5'H, flavonoid 3',5'-hydroxylase; DFR,  
 15 dihydroflavonol 4-reductase; ANS, anthocyanidin synthase; FGT, flavonoid 3-O-glycosyltransferase;  
 16 MT, methyltransferase; FLS, flavonol synthase; LAR, leucoanthocyanidin reductase; ANR,  
 17 anthocyanidin reductase.

18 **Table S1.** Calibration information of phenolic acids, flavonols, and flavan-3-ols

| compound                         | determination coefficient (R <sup>2</sup> ) | LOD <sup>a</sup> (mg/L) | LOQ <sup>b</sup> (mg/L) | linearity range (mg/L) |
|----------------------------------|---------------------------------------------|-------------------------|-------------------------|------------------------|
| caffeic acid                     | 0.9996                                      | 0.012                   | 0.025                   | 0.05–64                |
| quercetin 3- <i>O</i> -glucoside | 0.9990                                      | 0.08                    | 0.15                    | 0.3–15                 |
| epicatechin                      | 0.9994                                      | 0.07                    | 0.2                     | 0.2–8                  |

19 <sup>a</sup> LOD, limit of detection (S/N = 3).

20 <sup>b</sup> LOQ, limit of quantification (S/N = 10).

21    **REFERENCES**

- 22    (1)    Jaakola, L.; Määttä, K.; Pirttilä, A. M.; Törrönen, R.; Kärenlampi, S.; Hohtola, A. Expression of Genes  
23        Involved in Anthocyanin Biosynthesis in Relation to Anthocyanin, Proanthocyanidin, and Flavonol Levels  
24        during Bilberry Fruit Development. *Plant Physiol.* **2002**, *130* (2), 729–739.
- 25    (2)    Zorenc, Z.; Veberic, R.; Slatnar, A.; Koron, D.; Miosic, S.; Chen, M. H.; Haselmair-Gosch, C.; Halbwirth, H.;  
26        Mikulic-Petkovsek, M. A Wild ‘Albino’ Bilberry (*Vaccinium Myrtillus* L.) from Slovenia Shows Three  
27        Bottlenecks in the Anthocyanin Pathway and Significant Differences in the Expression of Several Regulatory  
28        Genes Compared to the Common Blue Berry Type. *PLoS One* **2017**, *12* (12), 1–14.
